# Supplementary material for: How has the University Community Been Coping During the COVID-19 Pandemic? An Iranian Survey
Source: Frontiers journal article supplement (doi:10.3389/fsoc.2021.645670), 2022-01-18
Supplement: Data_Sheet_1.pdf [file Data_Sheet_1.pdf]

## Coping with COVID-19

### Consent

1. I have been informed about the study “Coping with COVID-19” and I give consent to participate in this study:

Yes ☐0    No ☐1

2. I give consent that my answers will be handled as described in the information letter:

Yes ☐0    No ☐1

### Coping

What do/did you do to handle the situation during the “COVID-19 time”, if you feel/felt stressed, sad, or depressed or have/had other reactions?

|                                                                                                                      | Never<br>– 0               | Sometimes<br>–1            | Quite<br>often –2          | Very<br>often<br>–3        |
|----------------------------------------------------------------------------------------------------------------------|----------------------------|----------------------------|----------------------------|----------------------------|
| 3. Have you thought that your life is part of a greater whole?                                                       | <input type="checkbox"/> 0 | <input type="checkbox"/> 1 | <input type="checkbox"/> 2 | <input type="checkbox"/> 3 |
| 4. Have you thought or felt that a spiritual force exists in you to help you deal with the situation?                | <input type="checkbox"/> 0 | <input type="checkbox"/> 1 | <input type="checkbox"/> 2 | <input type="checkbox"/> 3 |
| 5. Has nature been an important resource for you in how to deal with your stress/sadness or other negative feelings? | <input type="checkbox"/> 0 | <input type="checkbox"/> 1 | <input type="checkbox"/> 2 | <input type="checkbox"/> 3 |
| 6. Has being alone and having the chance to contemplate helped you deal with the situation?                          | <input type="checkbox"/> 0 | <input type="checkbox"/> 1 | <input type="checkbox"/> 2 | <input type="checkbox"/> 3 |
| 7. Have you listened to the sounds of surrounding nature?                                                            | <input type="checkbox"/> 0 | <input type="checkbox"/> 1 | <input type="checkbox"/> 2 | <input type="checkbox"/> 3 |
| 8. Have you walked or engaged in any activities outdoors that give/gave you a spiritual feeling?                     | <input type="checkbox"/> 0 | <input type="checkbox"/> 1 | <input type="checkbox"/> 2 | <input type="checkbox"/> 3 |
| 9. Have you regularly meditated to deal with your stress/sadness or other negative feelings?                         | <input type="checkbox"/> 0 | <input type="checkbox"/> 1 | <input type="checkbox"/> 2 | <input type="checkbox"/> 3 |
| 10. Have you sought spiritual help from a religious leader?                                                          | <input type="checkbox"/> 0 | <input type="checkbox"/> 1 | <input type="checkbox"/> 2 | <input type="checkbox"/> 3 |
| 11. Have you thought that COVID-19 was caused by an evil power?                                                      | <input type="checkbox"/> 0 | <input type="checkbox"/> 1 | <input type="checkbox"/> 2 | <input type="checkbox"/> 3 |
| 12. Have you wondered whether God has left you or become angry that God is not present to help you?                  | <input type="checkbox"/> 0 | <input type="checkbox"/> 1 | <input type="checkbox"/> 2 | <input type="checkbox"/> 3 |
| 13. Have you had the feeling of a strong connection with God?                                                        | <input type="checkbox"/> 0 | <input type="checkbox"/> 1 | <input type="checkbox"/> 2 | <input type="checkbox"/> 3 |
| 14. Have you visited a church, synagogue, mosque, temple, or other religious place?                                  | <input type="checkbox"/> 0 | <input type="checkbox"/> 1 | <input type="checkbox"/> 2 | <input type="checkbox"/> 3 |
| 15. Have you prayed to God or another religious figure to make things better?                                        | <input type="checkbox"/> 0 | <input type="checkbox"/> 1 | <input type="checkbox"/> 2 | <input type="checkbox"/> 3 |
| 16. Have you listened to religious or spiritual music?                                                               | <input type="checkbox"/> 0 | <input type="checkbox"/> 1 | <input type="checkbox"/> 2 | <input type="checkbox"/> 3 |
| 17. Do/did you think that you have/had done your best and now it is only God who is in control?                      | <input type="checkbox"/> 0 | <input type="checkbox"/> 1 | <input type="checkbox"/> 2 | <input type="checkbox"/> 3 |

|                                                                                                                   | Never<br>– 0               | Sometimes<br>–1            | Quite<br>often –2          | Very<br>often<br>–3        |
|-------------------------------------------------------------------------------------------------------------------|----------------------------|----------------------------|----------------------------|----------------------------|
| 18. Have you tried to gain control of the situation directly without the help of God or another religious figure? | <input type="checkbox"/> 0 | <input type="checkbox"/> 1 | <input type="checkbox"/> 2 | <input type="checkbox"/> 3 |
| 19. Do you believe in God or another religious figure?                                                            | <input type="checkbox"/> 0 | <input type="checkbox"/> 1 | <input type="checkbox"/> 2 | <input type="checkbox"/> 3 |
| 20. Do you think there is a higher power or benevolent power?                                                     | <input type="checkbox"/> 0 | <input type="checkbox"/> 1 | <input type="checkbox"/> 2 | <input type="checkbox"/> 3 |
| 21. Would you say that you come from a religious family?                                                          | <input type="checkbox"/> 0 | <input type="checkbox"/> 1 | <input type="checkbox"/> 2 | <input type="checkbox"/> 3 |

### Background questions

28. What is your current work/student status?

- 1 ☐ Employed full-time
- 2 ☐ Employed part-time
- 3 ☐ On-campus student
- 4 ☐ Distance-learning student

29. What year were you born? .....

30. What is your gender?

- 1 ☐ Male
- 2 ☐ Female
- 3 ☐ Neither of the above

31. What is your highest education level?

- 1 ☐ Lower than elementary school
- 2 ☐ Elementary School or equivalent
- 3 ☐ High School or equivalent
- 4 ☐ University or equivalent

32. What is your current civil status?

- 1 ☐ Married
- 2 ☐ Divorced
- 3 ☐ Engaged
- 4 ☐ Widowed
- 5 ☐ Single
- 6 ☐ other (please briefly specify).....

33. Do you have children?

- ☐ 0 Yes
- ☐ 1 No

34. What characterizes the place you live?

- ☐ 0 Capital
- ☐ 1 Medium–large city, not capital

- ☐ 2 Small town close to a large city
- ☐ 3 Small town far from a large city

35. What is your country of birth? (Please write).....

36. Country of residence: (Please write) .....
